# Supplementary material for: Assessing the Impact of Integrated Specialist–Generalist Outpatient Models on Primary Care Experience among Chronic Disease Patients: Evidence from Shanghai
Source: Research Square preprint supplement (doi:10.21203/rs.3.rs-8121306/v1), 2025-12-23
Supplement: Supplementary file 1 [file 6bd6c32b6c805807b6dc3be1.docx]

**Supplementary file 2. The PCAT-AS dimension scores were compared between patients in the specialized outpatient clinic group and those in the general outpatient clinic group.**

**Appendix table 1**  Comparison of PCAT-AS scores in all dimensions and total scores between patients in the specialized clinic group and the general outpatient clinic group

| **Domain** | **Total(n=581)** | **Outpatient category** | | ***P* value** |
| --- | --- | --- | --- | --- |
| The specialized outpatient clinic group  (n=289) | The general outpatient clinic group  (n=292) |
| First-contact Utilization  Mean (SE) | 3.44±0.58 | 3.56±0.49 | 3.31±0.63 | ＜0.001 |
| First-contact Accessibility  Mean (SE) | 3.21±0.53 | 3.31±0.46 | 3.11±0.59 | ＜0.001 |
| Continuity of Care  Mean (SE) | 3.21±0.56 | 3.33±0.49 | 3.09±0.59 | ＜0.001 |
| Coordination (Referrals)  Mean (SE) | 2.46±1.57 | 2.83±1.49 | 2.10±1.57 | ＜0.001 |
| Coordination (Information Systems)  Mean (SE) | 3.27±0.53 | 3.38±0.47 | 3.17±0.57 | ＜0.001 |
| Comprehensiveness (Available Services)  Mean (SE) | 3.28±0.56 | 3.41±0.51 | 3.16±0.57 | ＜0.001 |
| Comprehensiveness (Service Delivery)  Mean (SE) | 3.45±0.53 | 3.59±0.42 | 3.31±0.59 | ＜0.001 |
| Family-centredness  Mean (SE) | 3.30±0.57 | 3.37±0.49 | 3.23±0.62 | 0.002 |
| Community Orientation  Mean (SE) | 3.15±0.60 | 3.23±0.55 | 3.07±0.64 | 0.002 |
| Cultural competence  Mean (SE) | 3.37±0.58 | 3.47±0.55 | 3.28±0.60 | ＜0.001 |
| Total  Mean (SE) | 32.14±4.72 | 33.47±4.00 | 30.83±5.02 | ＜0.001 |

**Appendix table 2**  Comparison of PCAT-AS scores in all dimensions and total scores between patients in the specialized diabetes clinic group and the general outpatient clinic group

| **Domain** | **Outpatient category** | | ***P* value** |
| --- | --- | --- | --- |
| The specialized diabetes clinic group(n = 156) | The general outpatient clinic group (n = 168) |
| First-contact Utilization  Mean (SE) | 3.60±0.50 | 3.28±0.71 | ＜0.001 |
| First-contact Accessibility | 3.24±0.47 | 3.01±0.63 | ＜0.001 |
| Continuity of Care  Mean (SE) | 3.36±0.50 | 3.00±0.62 | ＜0.001 |
| Coordination (Referrals)  Mean (SE) | 3.14±1.26 | 1.89±1.50 | ＜0.001 |
| Coordination (Information Systems)  Mean (SE) | 3.36±0.45 | 3.06±0.61 | ＜0.001 |
| Comprehensiveness (Available Services)  Mean (SE) | 3.43±0.46 | 3.10±0.63 | ＜0.001 |
| Comprehensiveness (Service Delivery) | 3.65±0.38 | 3.32±0.66 | ＜0.001 |
| Family-centredness  Mean (SE) | 3.35±0.49 | 3.20±0.71 | 0.033 |
| Community Orientation  Mean (SE) | 3.17±0.52 | 2.95±0.70 | 0.001 |
| Cultural competence  Mean (SE) | 3.52±0.57 | 3.24±0.68 | ＜0.001 |
| Total  Mean (SE) | 33.81±3.76 | 30.06±5.63 | ＜0.001 |

**Appendix table 3**  Comparison of PCAT-AS scores in all dimensions and total scores between patients in the specialized COPD clinic group and the general outpatient clinic group

| **Domain** | **Outpatient category** | | ***P value*** |
| --- | --- | --- | --- |
| The specialized COPD clinic group(n = 133) | The general outpatient clinic group(n = 124) |
| First-contact Utilization  Mean (SE) | 3.52±0.47 | 3.36±0.50 | 0.007 |
| First-contact Accessibility  Mean (SE) | 3.38±0.43 | 3.24±0.49 | 0.013 |
| Continuity of Care  Mean (SE) | 3.30±0.47 | 3.21±0.54 | 0.181 |
| Coordination (Referrals)  Mean (SE) | 2.47±1.64 | 2.39±1.62 | 0.705 |
| Coordination (Information Systems)  Mean (SE) | 3.40±0.49 | 3.32±0.46 | 0.188 |
| Comprehensiveness (Available Services)  Mean (SE) | 3.38±0.57 | 3.24±0.48 | 0.03 |
| Comprehensiveness (Service Delivery)  Mean (SE) | 3.52±0.47 | 3.29±0.49 | ＜0.001 |
| Family-centredness  Mean (SE) | 3.41±0.49 | 3.27±0.49 | 0.03 |
| Community Orientation  Mean (SE) | 3.28±0.58 | 3.24±0.51 | 0.53 |
| Cultural competence  Mean (SE) | 3.40±0.51 | 3.32±0.47 | 0.196 |
| Total  Mean (SE) | 33.07±4.23 | 31.89±3.82 | 0.02 |
