# Supplementary material for: Assessing the Impact of Integrated Specialist–Generalist Outpatient Models on Primary Care Experience among Chronic Disease Patients: Evidence from Shanghai
Source: Research Square preprint supplement (doi:10.21203/rs.3.rs-8121306/v1), 2025-12-23
Supplement: Supplementary file 2 [file 72159864bf74ce2c17b7168c.docx]

**Supplementary file 1. Summary of the Survey Results on the Experiences of Patients with Chronic Diseases in Shanghai with Primary Healthcare Services**

1. Your gender:

| Options | Subtotal | Percentage |
| --- | --- | --- |
| Male | 307 | ▌▌▌▌▌▌▌▌▌▌▌▌▌▌▌▌▌▌▌▌▌52.8% |
| Female | 274 | ▌▌▌▌▌▌▌▌▌▌▌▌▌▌▌▌▌▌47.2% |
| Number of valid responses for this question | 581 |  |

2.Your age:

| Categories: | Subtotal | Percentage |
| --- | --- | --- |
| ≤60 years | 147 | ▌▌▌▌▌▌▌▌▌▌25.3% |
| 61-70 years | 173 | ▌▌▌▌▌▌▌▌▌▌▌29.8% |
| ≥71 years | 261 | ▌▌▌▌▌▌▌▌▌▌▌▌▌▌▌▌▌44.9% |
| Number of valid responses for this question | 581 |  |

3. Status of residence:

| Options: | Subtotal | Percentage |
| --- | --- | --- |
| Registered population in Shanghai | 501 | ▌▌▌▌▌▌▌▌▌▌▌▌▌▌▌▌▌▌▌▌▌▌▌▌▌▌▌▌▌▌▌▌▌▌86.2% |
| Non Shanghai registered permanent resident population (more than half a year) | 76 | ▌▌▌▌▌13.1% |
| Floating population | 4 | 0.7% |
| Number of valid responses for this question | 581 |  |

4. Educational level:

| Options: | Subtotal | Percentage |
| --- | --- | --- |
| Primary school and below | 104 | ▌▌▌▌▌▌▌17.9% |
| Junior high school | 215 | ▌▌▌▌▌▌▌▌▌▌▌▌▌▌37.0% |
| High school | 160 | ▌▌▌▌▌▌▌▌▌▌▌27.5% |
| University and above | 102 | ▌▌▌▌▌▌▌17.6% |
| Number of valid responses for this question | 581 |  |

5. Type of health insurance:

| Options: | Subtotal | Percentage |
| --- | --- | --- |
| Medical insurance for urban employees | 348 | ▌▌▌▌▌▌▌▌▌▌▌▌▌▌▌▌▌▌▌▌▌▌▌59.9% |
| Medical insurance for urban and rural residents | 187 | ▌▌▌▌▌▌▌▌▌▌▌▌32.2% |
| Medical assistance for the poor | 15 | ▌2.6% |
| Other (such as commercial medical insurance, etc.) | 31 | ▌▌5.3% |
| Number of valid responses for this question | 581 |  |

6. Self evaluation of medical expense burden:

| Options: | Subtotal | Percentage |
| --- | --- | --- |
| Completely affordable | 209 | ▌▌▌▌▌▌▌▌▌▌▌▌▌▌36.0% |
| Affordable | 270 | ▌▌▌▌▌▌▌▌▌▌▌▌▌▌▌▌▌▌46.5% |
| Average | 83 | ▌▌▌▌▌14.3% |
| A bit difficult | 17 | ▌2.9% |
| Very difficult | 2 | 0.3% |
| Number of valid responses for this question | 581 |  |

7. Are you aware of your chronic disease hazards:

| Options: | Subtotal | Percentage |
| --- | --- | --- |
| Yes | 525 | ▌▌▌▌▌▌▌▌▌▌▌▌▌▌▌▌▌▌▌▌▌▌▌▌▌▌▌▌▌▌▌▌▌▌▌▌90.4% |
| No | 56 | ▌▌▌9.6% |
| Number of valid responses for this question | 581 |  |

8. Whether the receiving doctor or family doctor has given you health education on relevant diseases:

| Options: | Subtotal | Percentage |
| --- | --- | --- |
| Yes | 495 | ▌▌▌▌▌▌▌▌▌▌▌▌▌▌▌▌▌▌▌▌▌▌▌▌▌▌▌▌▌▌▌▌▌▌85.2% |
| No | 86 | ▌▌▌▌▌14.8% |
| Number of valid responses for this question | 581 |  |

| Question \ Options | Definitely yes | Probably yes | Probably not | Definitely not | Not sure / Cannot remember |
| --- | --- | --- | --- | --- | --- |
| 9. When you require a routine general health check-up, do you first visit a community health service centre before seeking care from other medical institutions? | 294(50.60%) | 220(37.87%) | 41(7.06%) | 3(0.52%) | 23(3.96%) |
| 10. When new health issues arise, do you initially consult your community general practitioner before turning to other medical institutions? | 310(53.36%) | 212(36.49%) | 40(6.88%) | 0(0.00%) | 19(3.27%) |
| 11. When you need to consult a specialist, is your community general practitioner able to provide a referral? | 315(54.22%) | 196(33.73%) | 32(5.51%) | 0(0.00%) | 38(6.54%) |
| 12.Will the general practitioner in this community health service centre provide services for you on weekends (such as Saturday or Sunday) | 266(45.78%) | 217(37.35%) | 78(13.43%) | 3(0.52%) | 17(2.93%) |
| 13. During working hours, if you fall ill, will your community general practitioner provide medical care on the same day? | 314(54.04%) | 204(35.11%) | 54(9.29%) | 0(0.00%) | 9(1.55%) |
| 14. During their working hours, can you obtain timely medical advice from your community general practitioner via telephone or other means of communication if needed? | 232(39.93%) | 222(38.21%) | 43(7.40%) | 3(0.52%) | 81(13.94%) |
| 15. Outside of regular working hours, if you become ill, are you able to contact your community general practitioner, family doctor, or their colleagues via telephone or similar means? | 219(37.69%) | 199(34.25%) | 41(7.06%) | 4(0.69%) | 118(20.31%) |
| 16. If you become ill at night, is there a doctor available at the community health centre or for home visits during nighttime hours? | 121(20.83%) | 195(33.56%) | 54(9.29%) | 27(4.65%) | 184(31.67%) |
| 17. When visiting the community health service centre, are you consistently treated by the same general practitioner each time? | 158(27.19%) | 225(38.73%) | 74(12.74%) | 3(0.52%) | 121(20.83%) |
| 18. can your general practitioner or family doctor explain clearly when answering your questions so that you can understand? | 293(50.43%) | 223(38.38%) | 50(8.61%) | 2(0.34%) | 15(2.58%) |
| 19. Does your general practitioner or family doctor understand the health issues that are most important to you? | 217(37.35%) | 215(37.01%) | 48(8.26%) | 3(0.52%) | 98(16.87%) |

1. Have you recently seen any specialized doctors or received any specialized treatment (referring to specialized hospitals or general hospitals)?

| Options: | Subtotal | Percentage |
| --- | --- | --- |
| Yes | 429 | ▌▌▌▌▌▌▌▌▌▌▌▌▌▌▌▌▌▌▌▌▌▌▌▌▌▌▌▌▌73.8% |
| No (Skip to Question 26) | 125 | ▌▌▌▌▌▌▌▌21.5% |
| Not sure / Cannot remember (Skip to Question 26) | 27 | ▌4.7% |
| Number of valid responses for this question | 581 |  |

If you have visited a general hospital:

| Question \ Options | Definitely yes | Probably yes | Probably not | Definitely not | Not sure / Cannot remember |
| --- | --- | --- | --- | --- | --- |
| 21. Has your general practitioner discussed with you the option of visiting other medical institutions (such as general hospitals) for the treatment of your condition? | 208(48.48%) | 153(35.66%) | 41(9.56%) | 10(2.33%) | 17(3.96%) |
| 22. Does your general practitioner or their colleague assist you in making appointments with specific departments in general hospitals? | 220(51.28%) | 128(29.84%) | 40(9.32%) | 7(1.63%) | 34(7.93%) |
| 23. Does your general practitioner provide relevant information about your medical condition to the doctors in the general hospital? | 201(46.85%) | 145(33.80%) | 44(10.26%) | 2(0.47%) | 37(8.26%) |
| 24. After receiving treatment or other health services from a department in a general hospital, does your general practitioner follow up with you about your experience? | 204(47.55%) | 161(37.53%) | 30(6.99%) | 0(0.00%) | 34(7.93%) |

| Question \ Options | Definitely yes | Probably yes | Probably not | Definitely not | Not sure / Cannot remember |
| --- | --- | --- | --- | --- | --- |
| 25. When visiting your community general practitioner or family doctor, do you bring your personal medical records, such as vaccination history or medical booklets? | 298(51.29%) | 200(34.42%) | 63(10.84%) | 1(0.17%) | 19(3.27%) |
| 26. If necessary, are you able to access your previous medical visit records? | 325(55.94%) | 198(34.08%) | 27(4.65%) | 0(0.00%) | 31(5.34%) |
| 27. Each time you visit your general practitioner, are you able to view your medical records? | 144(24.78%) | 214(36.83%) | 35(6.02%) | 32(5.51%) | 156(26.85%) |

Below are medical services that you or your family members may sometimes need. For each item, please indicate whether your general practitioner is able to provide the service.

| Question \ Options | Definitely yes | Probably yes | Probably not | Definitely not | Not sure / Cannot remember |
| --- | --- | --- | --- | --- | --- |
| 28. Consultation and suggestions on diet and nutrition | 298(51.29%) | 207(35.63%) | 39(6.71%) | 0(0.00%) | 37(6.37%) |
| 29. Immunizations | 309(53.18%) | 194(33.39%) | 44(7.57%) | 3(0.52%) | 31(5.34%) |
| 30. Treatment of dental diseases | 265(45.61%) | 219(37.69%) | 35(6.02%) | 1(0.17%) | 57(9.81%) |
| 31. Family planning or contraceptive methods | 204(35.11%) | 198(34.08%) | 22(3.79%) | 12(2.07%) | 145(24.96%) |
| 32. Mental health counseling | 184(31.67%) | 219(37.69%) | 49(8.43%) | 8(1.38%) | 121(20.83%) |
| 33. Wound suturing | 235(40.45%) | 208(35.80%) | 35(6.02%) | 4(0.69%) | 99(17.04%) |

When you consult your general practitioner, do they discuss the following topics with you?

| Question \ Options | Definitely yes | Probably yes | Probably not | Definitely not | Not sure / Cannot remember |
| --- | --- | --- | --- | --- | --- |
| 34. Advice on healthy eating and getting adequate sleep | 316(54.39%) | 195(33.56%) | 31(5.34%) | 0(0.00%) | 39(6.71%) |
| 35. Home safety, such as fall prevention and safe medication storage | 275(47.33%) | 218(37.52%) | 32(5.51%) | 1(0.17%) | 55(9.47%) |
| 36. Recommendations for moderate physical activity | 320(55.08%) | 210(36.14%) | 38(6.54%) | 0(0.00%) | 13(2.24%) |
| 37. Reviewing and discussing the medications you are currently taking | 324(55.77%) | 211(36.32%) | 26(4.48%) | 0(0.00%) | 20(3.44%) |
| 38. When proposing a treatment plan for you or your family members, does your general practitioner seek your input or opinion? | 246(42.34%) | 263(45.27%) | 31(5.34%) | 0(0.00%) | 41(7.06%) |
| 39. Has your general practitioner ever asked other members of your family about potential health issues they may be facing? | 221(38.04%) | 263(45.27%) | 43(7.40%) | 3(0.52%) | 51(8.78%) |
| 40. If deemed helpful, would your general practitioner meet with other members of your family? | 250(43.03%) | 236(40.62%) | 29(4.99%) | 2(0.34%) | 64(11.02%) |
| 41. Has your general practitioner or family doctor ever conducted a home visit for you? | 183(31.50%) | 176(30.29%) | 70(12.05%) | 32(5.51%) | 120(20.65%) |
| 42. Is your general practitioner aware of the major health issues faced by the community or neighborhood in which you live? | 181(31.15%) | 223(38.38%) | 38(6.54%) | 2(0.34%) | 137(23.58%) |
| 43. In order to provide better care, does your general practitioner consider and incorporate opinions or advice from other doctors? | 266(45.78%) | 223(38.38%) | 40(6.88%) | 0(0.00%) | 52(8.95%) |
| 44. Would you recommend your general practitioner to your friends or family members? | 309(53.18%) | 202(34.77%) | 19(3.27%) | 0(0.00%) | 51(8.78%) |
| 45. Would you recommend your family doctor to people who prefer using traditional remedies or self-prepared medicines (e.g., Traditional Chinese Medicine)? | 244(42.00%) | 213(36.66%) | 25(4.30%) | 2(0.34%) | 97(16.70%) |
